# Supplementary material for: Use of Low-Cost Sensors to Characterize Occupational Exposure to PM2.5 Concentrations Inside an Industrial Facility in Santa Ana, CA: Results from a Worker- and Community-Led Pilot Study
Source: MDPI journal article supplement (doi:10.3390/atmos13050722), 2022-05-01
Supplement: s1 [file s1]

## Supplemental Materials

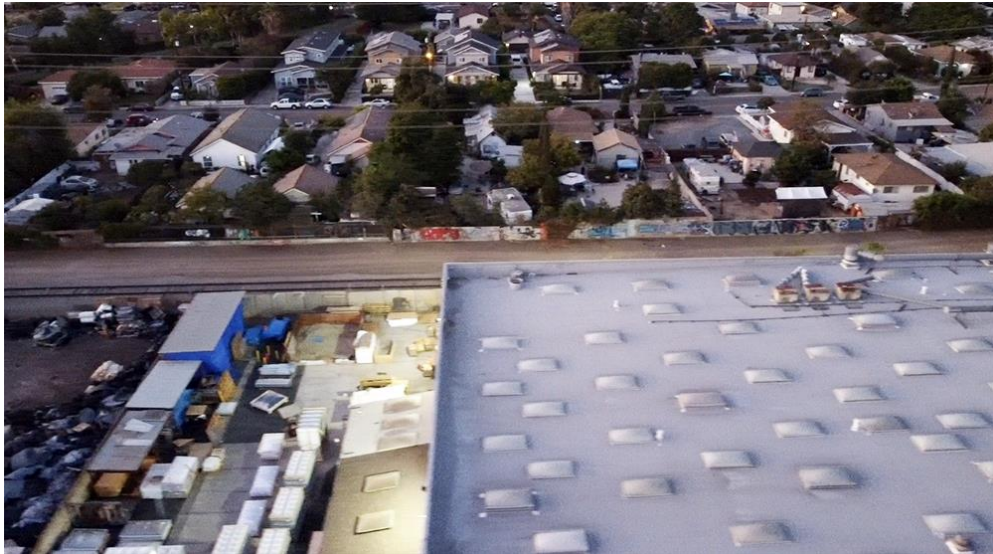

**Figure S1.** Aerial image depicting industrial facility (entire lower half of image) in relation to neighboring homes (upper half).

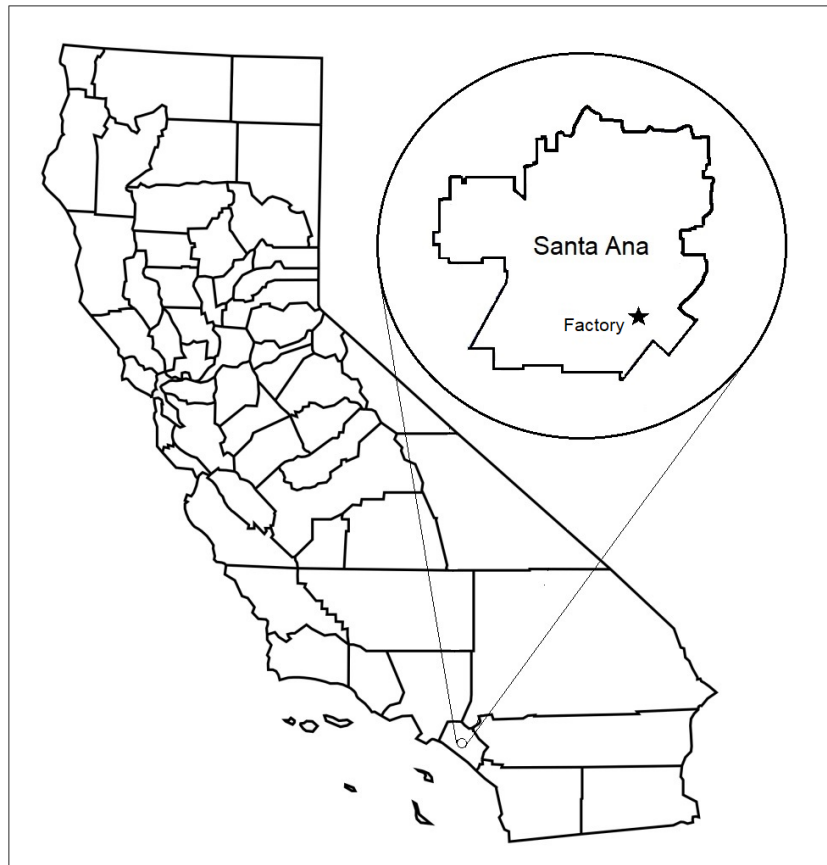

**Figure S2.** Map depicting industrial facility and city of Santa Ana within California.

**Table S1.** Summary statistics of PM<sub>2.5</sub> concentrations restricted to minutes when outdoor and indoor samples were collected simultaneously.

|                        | N <sup>a</sup> | Mean  | St. Dev. | Medan | Min. | Max.    |
|------------------------|----------------|-------|----------|-------|------|---------|
| <b>Indoors by Type</b> |                |       |          |       |      |         |
| Mobile (Personal)      | 1,344          | 114.8 | 128.5    | 77.5  | 16.3 | 1,000.0 |
| Stationary             | 1,417          | 186.6 | 221.6    | 104.2 | 1.0  | 1,000.0 |
| <b>Outdoors</b>        | 463            | 19.0  | 6.0      | 21.0  | 1.0  | 28.2    |

<sup>a</sup> The number of one-minute average measurements recorded by Atmotube device.

The following table presents summary statistics for PM<sub>2.5</sub> (µg/m<sup>3</sup>) concentrations for each sampling device averaged over both buildings during the three workdays. The table is distinct from Figure 6 in the main manuscript in that Table S1 includes not only the personal monitoring devices, but the stationary devices as well. Additionally, the table offers a more comprehensive summary of the data (e.g., min, max, etc.).

**Table S2.** Summary statistics for PM<sub>2.5</sub> (µg/m<sup>3</sup>) concentrations across all sampling devices averaged over three workdays.

| Type                 | N     | Mean  | St. Dev. | Min | Max   |
|----------------------|-------|-------|----------|-----|-------|
| Indoors (personal)   | 912   | 107.8 | 74.3     | 1   | 274   |
| Indoors (personal)   | 1,533 | 34.8  | 19.6     | 8   | 147   |
| Indoors (personal)   | 1,036 | 103.5 | 165.5    | 3   | 1,000 |
| Indoors (personal)   | 511   | 118.6 | 110.3    | 1   | 728   |
| Indoors (personal)   | 1,548 | 50.3  | 34.6     | 9   | 209   |
| Indoors (personal)   | 1,533 | 210.9 | 193.7    | 3   | 1,000 |
| Indoors (personal)   | 1,533 | 101.4 | 64.1     | 1   | 304   |
| Indoors (personal)   | 1,548 | 33.5  | 18.5     | 1   | 112   |
| Indoors (stationary) | 1,353 | 106.2 | 60.5     | 1   | 275   |
| Indoors (stationary) | 1,533 | 30.5  | 25.7     | 1   | 88    |

|                      |       |       |       |    |       |
|----------------------|-------|-------|-------|----|-------|
| Indoors (stationary) | 1,037 | 92.1  | 119.6 | 1  | 1,000 |
| Indoors (stationary) | 511   | 184.2 | 140.8 | 1  | 988   |
| Indoors (stationary) | 1,548 | 127.5 | 116.0 | 1  | 786   |
| Indoors (stationary) | 1,532 | 406.1 | 315.1 | 14 | 1,000 |
| Indoors (stationary) | 1,548 | 99.2  | 113.6 | 1  | 1,000 |
| Indoors (stationary) | 1,533 | 31.6  | 13.8  | 2  | 75    |

Figure S1 presents an example of a three-day sampling period as measured by a personal air monitoring device that was carried by one of the welders (Worker 6) inside of the industrial facility. The figure is meant only to provide an example of the 1-minute data that was reported by the air monitoring instruments (without any post-processing averaging). As shown, the maximum 1-minute PM<sub>2.5</sub> concentration reached as high as 1,000 µg/m<sup>3</sup> on Day 3 within the facility, and exceeded 600 µg/m<sup>3</sup> on all three days for this worker.

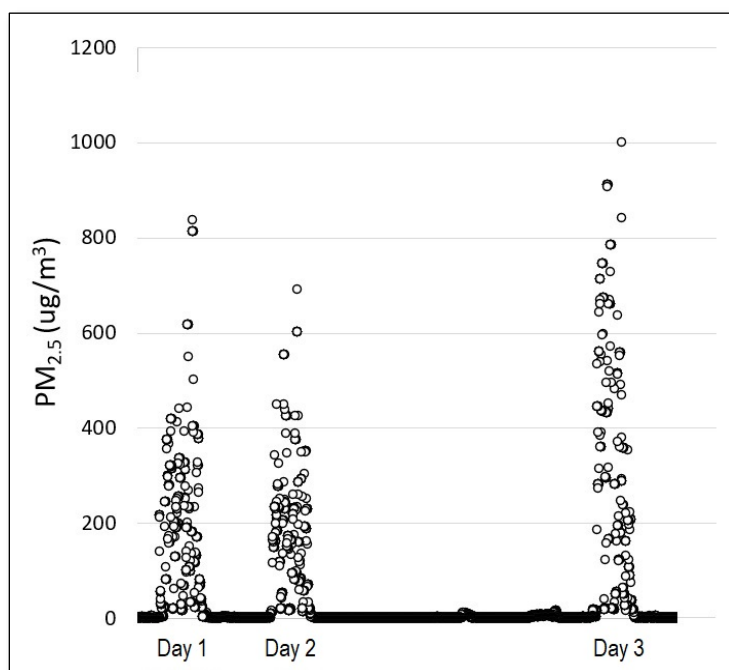

**Figure S3.** Example of the three-day sampling period as measured by a personal air monitor carried by one of the welders (Worker 6) inside of the industrial facility.
